# Supplementary material
Source: Springer Nature journal article supplement (https://www.springermedizin.de/resource/supplementary/12891_2012_1670_MOESM3_ESM.pdf/9508980)

# Odds Ratio and 95% Confidence Interval

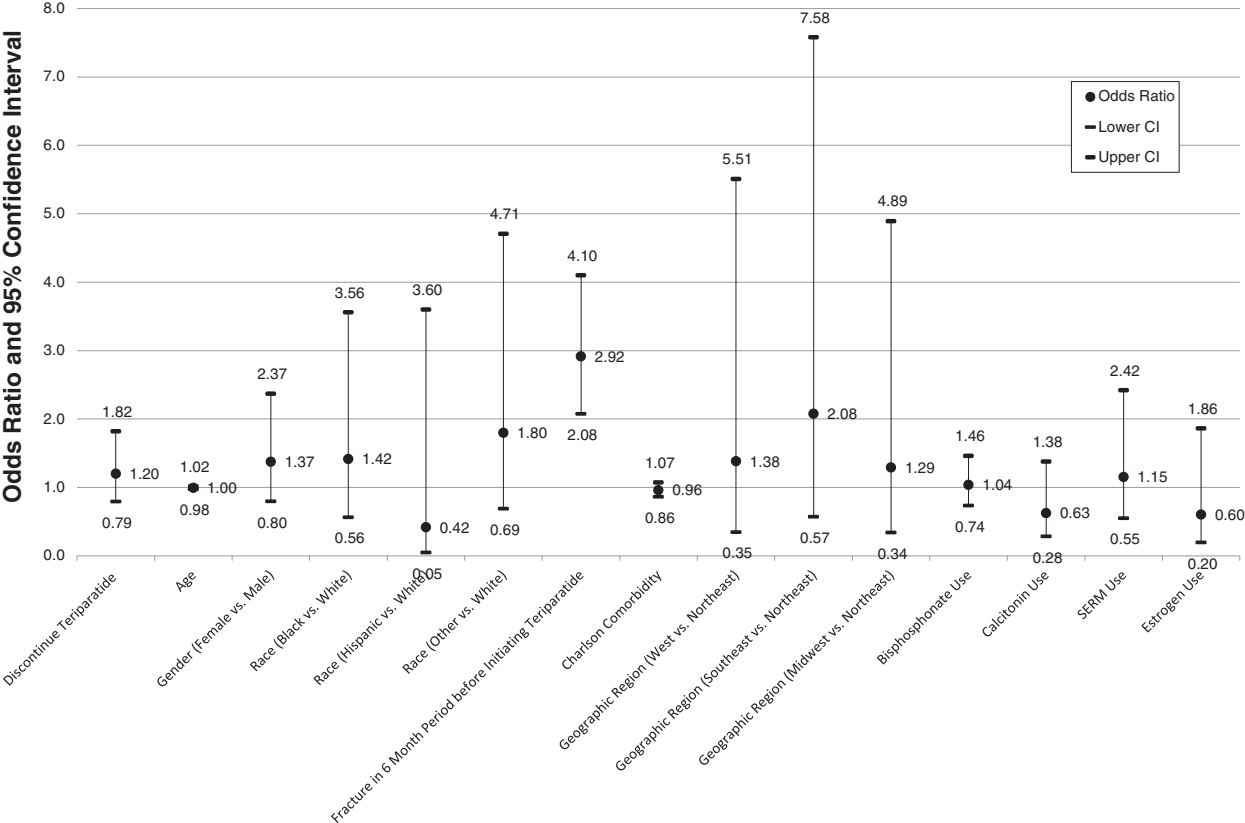

Supplement: MOESM3 [file 9508980]
